# Supplementary material for: AI-Guided Real-Time Feedback Enhances Clinical Photography Training in Dentistry: A Pilot Randomized Study on Workflow and Skill Development
Source: Research Square preprint supplement (doi:10.21203/rs.3.rs-6605130/v1), 2025-06-12
Supplement: Supplementary file 1 [file 9e5682957dbaceb39be57229.docx]

# Figures


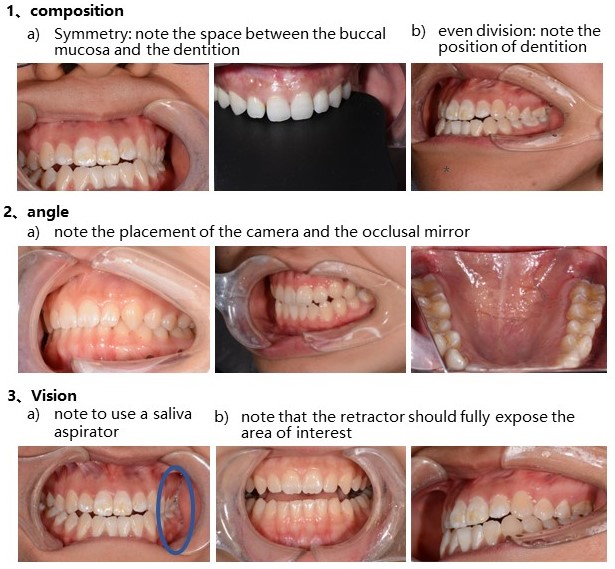


Figure S1. Snapshot of the pre-trial multimedia presentation on intra-oral photography fundamentals


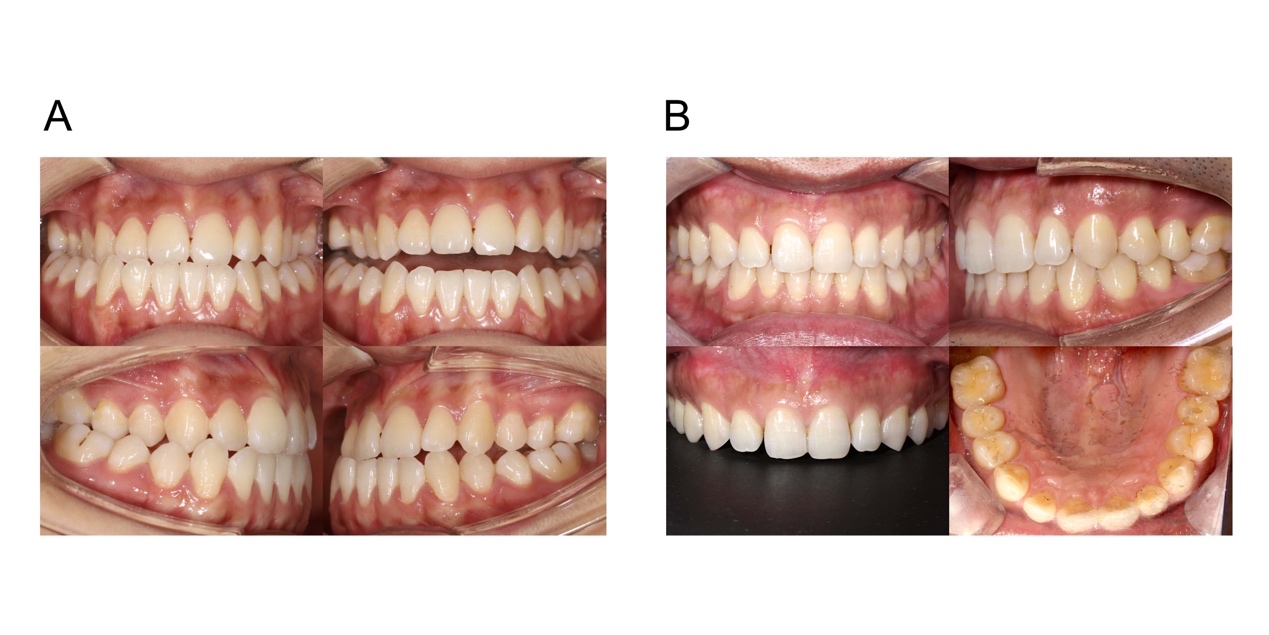


Figure S2. Thumbnails of the standard intra-oral dental portfolio. A, Set 1. B, Set 2.

# Tables

Table S1. The scoring criteria of dental photography

| **Scoring criterion** |
| --- |
| **Composition** |
| - The horizontal axis and vertical axis are not tilted. - The dentition is in the center of the image. - The lips and buccal mucosa are not in contact with the teeth. - For intraoral frontal view in maximum intercuspation (MI), occlusal full-arch maxillary view and frontal view against a black background, the dentition is symmetrical. |
|
|
|
| **Content** |
| - The teeth are clearly visible. - The teeth is not in contact with buccal mucosa. - For intraoral frontal view with separated teeth, the incisal edges, occlusal plane inclination, curves of Spee and Wilson are shown clearly. - For intraoral lateral view in MI, the Angle's molar, canine and incisal relationships are shown clearly. - For intraoral occlusal full-arch maxillary view, the palatal side of maxillary front teeth is visualized. |
|
|
|

*For each photo, one point will be added for each scoring criterion met.

Table S2. The questionnaire for participants

| **Category** |
| --- |
| **Improvement of photography technique** |
| - The workshop has enhanced my proficiency in clinical photography. - The workshop has enhanced my proficiency in doctor-patient communication. |
| **Establishment of professional identity** |
| - I notice that through ongoing practice, I am on track to achieve full mastery in dental photography. - I believe that I am potent of becoming a qualified dentist in the future. |
